# Supplementary material for: Colloidal swimmers near curved and structured walls
Source: Royal Society of Chemistry journal article supplement (doi:10.1039/c9sm01432b), 2019-01-01
Supplement: c9sm01432b1.pdf [file c9sm01432b1.pdf]

**Supplementary Information for  
Colloidal swimmers near curved and structured walls**

S. Das, and A. Cacciuto  
*Department of Chemistry, Columbia University  
3000 Broadway, New York, NY 10027*

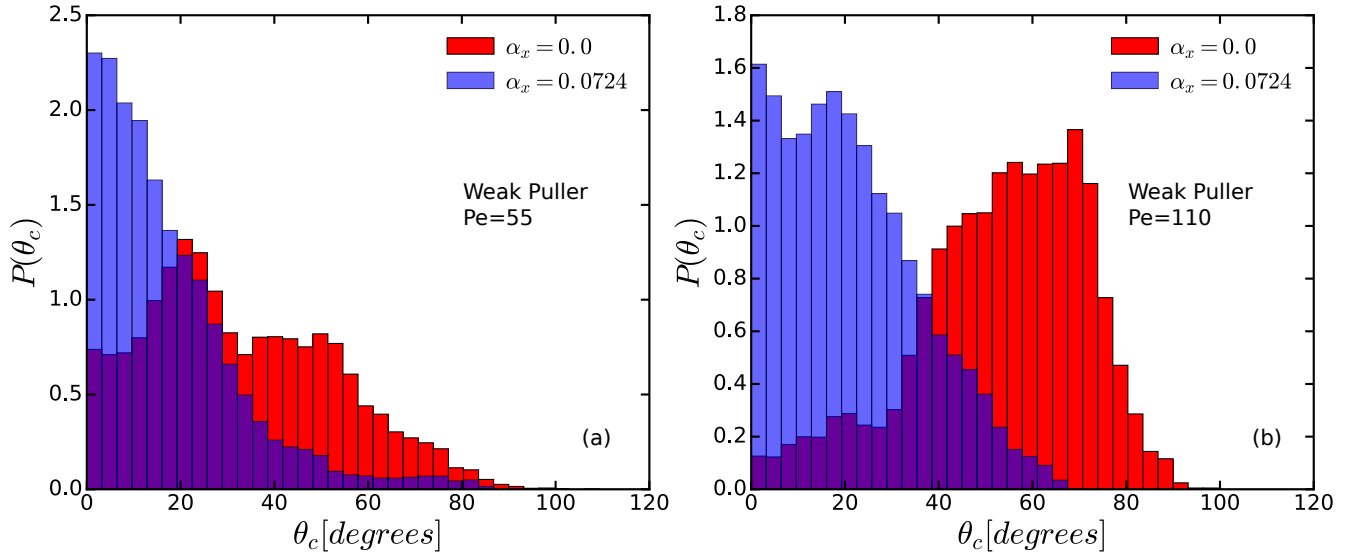

FIG. 1. **CYLINDRICAL SURFACE:** Distribution of the inclination angle of a weak Janus puller near surfaces with curvature  $\alpha_x = R/R_x = 0$  (red), 0.0724 (blue) for (a)  $Pe = 55$ ,  $\beta = 1.5$ , (b)  $Pe = 110$ ,  $\beta = 1.5$ .

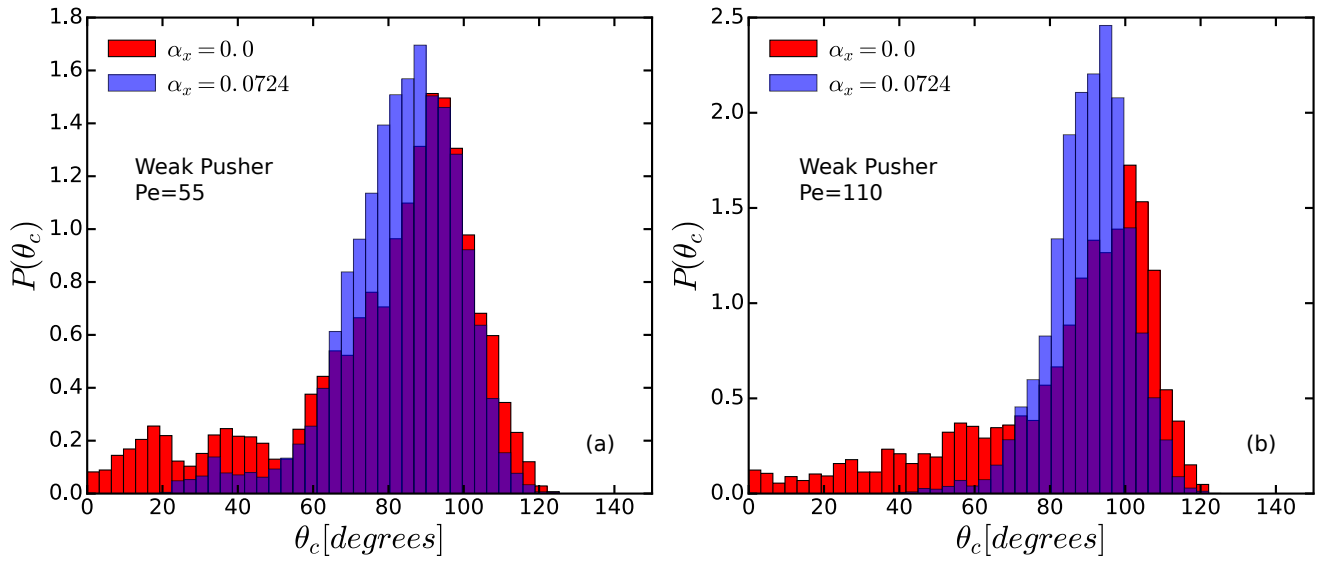

FIG. 2. **CYLINDRICAL SURFACE:** Distribution of the inclination angle of a weak Janus pusher near surfaces with curvature  $\alpha_x = R/R_x = 0$  (red), 0.0724 (blue) for (a)  $Pe = 55$ ,  $\beta = -1.5$ , (b)  $Pe = 110$ ,  $\beta = -1.5$ .
